# Supplementary material for: Synthesis of Ru(ii) cyclometallated complexesviaC(aryl)–S bond activation: X-ray structure, DNA/BSA protein binding and antiproliferative activity
Source: Royal Society of Chemistry journal article supplement (doi:10.1039/d3nj02391e), 2023-01-01
Supplement: d3nj02391e1.pdf [file d3nj02391e1.pdf]

## Supporting Information

### **Synthesis of Ru(II) cyclometallated complexes via C(aryl)-S bond activation: X-ray structure, DNA/BSA protein binding and antiproliferative activity**

Akash Das,<sup>a</sup> Subrata Mandal,<sup>a</sup> Rimi Mukherjee,<sup>b</sup> Rahul Naskar,<sup>a</sup> Nabendu Murmu<sup>b</sup> and Tapan K. Mondal<sup>\*a</sup>

<sup>a</sup>Department of Chemistry, Jadavpur University, Kolkata- 700032, India. E-mail: [tapank.mondal@jadavpuruniversity.in](mailto:tapank.mondal@jadavpuruniversity.in)

<sup>b</sup>Department of Signal Transduction and Biogenic Amines (STBA), Chittaranjan National Cancer Institute, Kolkata- 700026, India.

### CONTENTS

- Fig. S1: <sup>1</sup>H-NMR spectrum of ligand HL<sup>1</sup>-SEt in CDCl<sub>3</sub>  
Fig. S2: <sup>1</sup>H-NMR spectrum of ligand HL<sup>2</sup>-SMe in CDCl<sub>3</sub>  
Fig. S3: <sup>1</sup>H-NMR spectrum of [Ru(L<sup>1</sup>)(CO)(PPh<sub>3</sub>)<sub>2</sub>] (**1**) complex in CDCl<sub>3</sub>  
Fig. S4: <sup>1</sup>H-NMR spectrum of [Ru(L<sup>2</sup>)(CO)(PPh<sub>3</sub>)<sub>2</sub>] (**2**) complex in CDCl<sub>3</sub>  
Fig. S5: <sup>13</sup>C-NMR spectrum of ligand HL<sup>1</sup>-SEt in CDCl<sub>3</sub>  
Fig. S6: <sup>13</sup>C-NMR spectrum of ligand HL<sup>2</sup>-SMe in CDCl<sub>3</sub>  
Fig. S7: HRMS of ligand HL<sup>1</sup>-SEt  
Fig. S8: HRMS of ligand HL<sup>2</sup>-SMe  
Fig. S9: HRMS of [Ru(L<sup>1</sup>)(CO)(PPh<sub>3</sub>)<sub>2</sub>] (**1**) complex  
Fig. S10: HRMS of [Ru(L<sup>2</sup>)(CO)(PPh<sub>3</sub>)<sub>2</sub>] (**2**) complex  
Fig. S11: IR spectrum of ligand HL<sup>1</sup>-SEt  
Fig. S12: IR spectrum of ligand HL<sup>2</sup>-SMe  
Fig. S13: IR spectrum of [Ru(L<sup>1</sup>)(CO)(PPh<sub>3</sub>)<sub>2</sub>] (**1**) complex  
Fig. S14: IR spectrum of [Ru(L<sup>2</sup>)(CO)(PPh<sub>3</sub>)<sub>2</sub>] (**2**) complex  
Table S1: Crystallographic data and refinement parameters of complexes **1** and **2**  
Table S2: Selected X-ray and calculated bond distances and angles of complexes **1** and **2**  
Table S3: Energy and composition of some selected molecular orbitals of complex **1**  
Table S4: Energy and composition of some selected molecular orbitals of complex **2**  
Table S5: Vertical electronic transition calculated by TDDFT/CPCM method of complexes **1** and **2**  
Fig. S15: Contour plots of some selected molecular orbital of **1**  
Fig. S16: Contour plots of some selected molecular orbital of **2**  
Fig. S17: Plot of log [(F<sub>0</sub>-F)/F] versus log [complex] of complexes **1** (A) and **2** (B)  
Fig. S18: Percentage cell viability measured for HL<sup>1</sup>-SEt (A) and HL<sup>2</sup>-SMe (B) against MCF-7  
Fig. S19: Percentage cell viability measured for complex **1** (A) and **2** (B) against MCF-7  
Fig. S20: UV spectra of the metal complexes **1**(A) and **2**(B), showing their stability in 1:10 DMSO /buffer medium at 0 and 24 h.  
Fig. S21: Absorption spectra of complexes (—) and after addition of BSA (—).

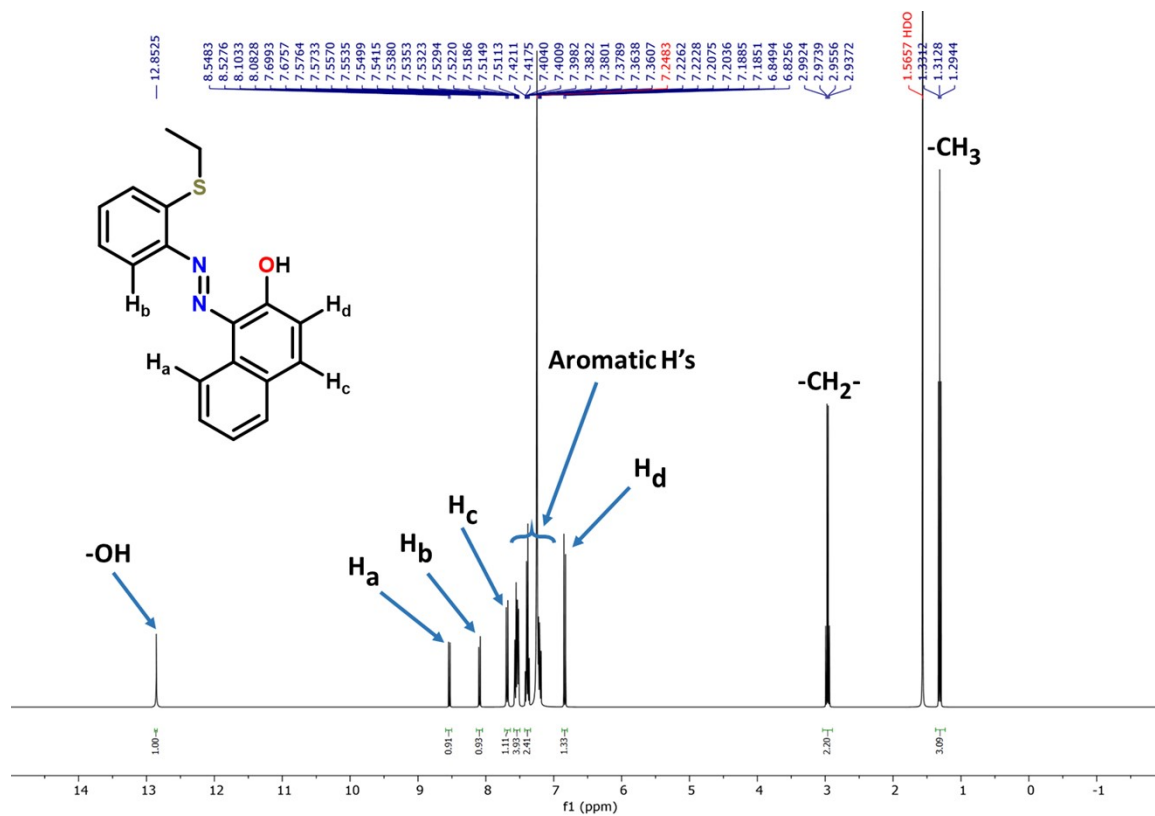

**Figure S1:  $^1\text{H-NMR}$  spectrum of ligand  $\text{HL}^1\text{-SEt}$  in  $\text{CDCl}_3$**

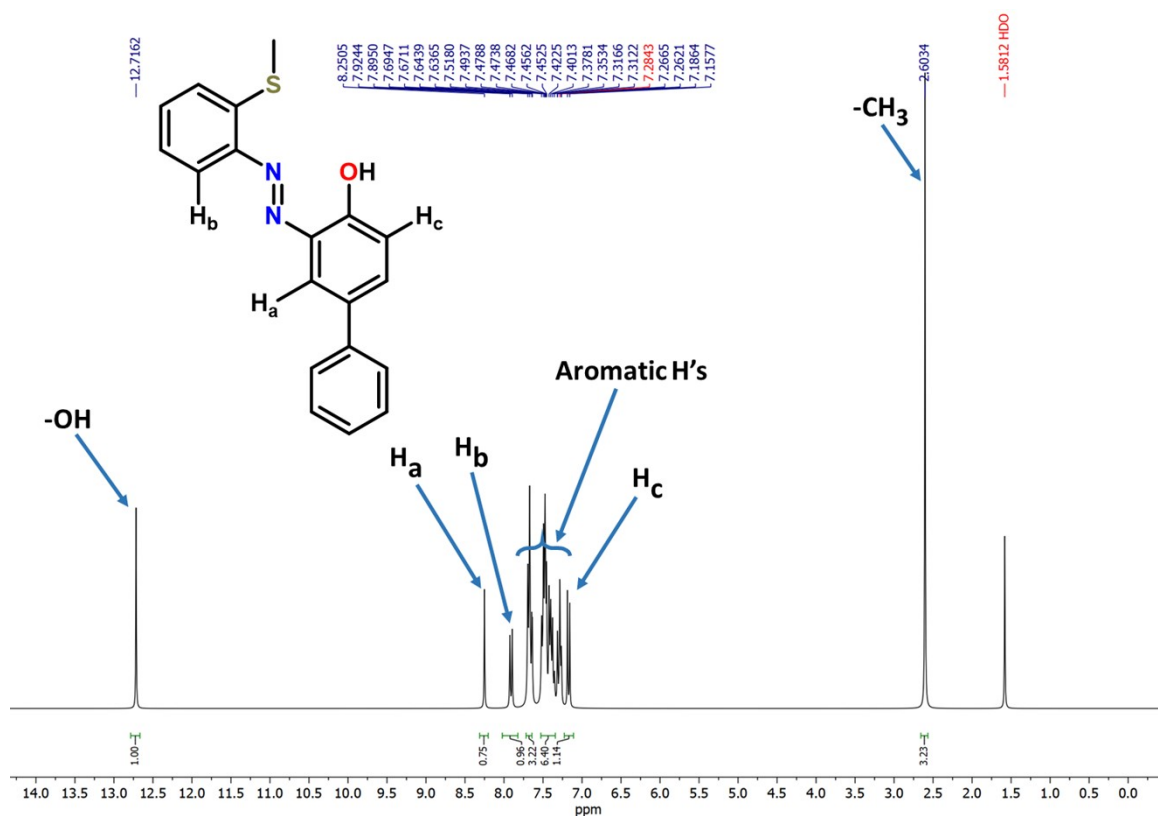

**Figure S2:  $^1\text{H-NMR}$  spectrum of ligand  $\text{HL}^2\text{-SMe}$  in  $\text{CDCl}_3$**

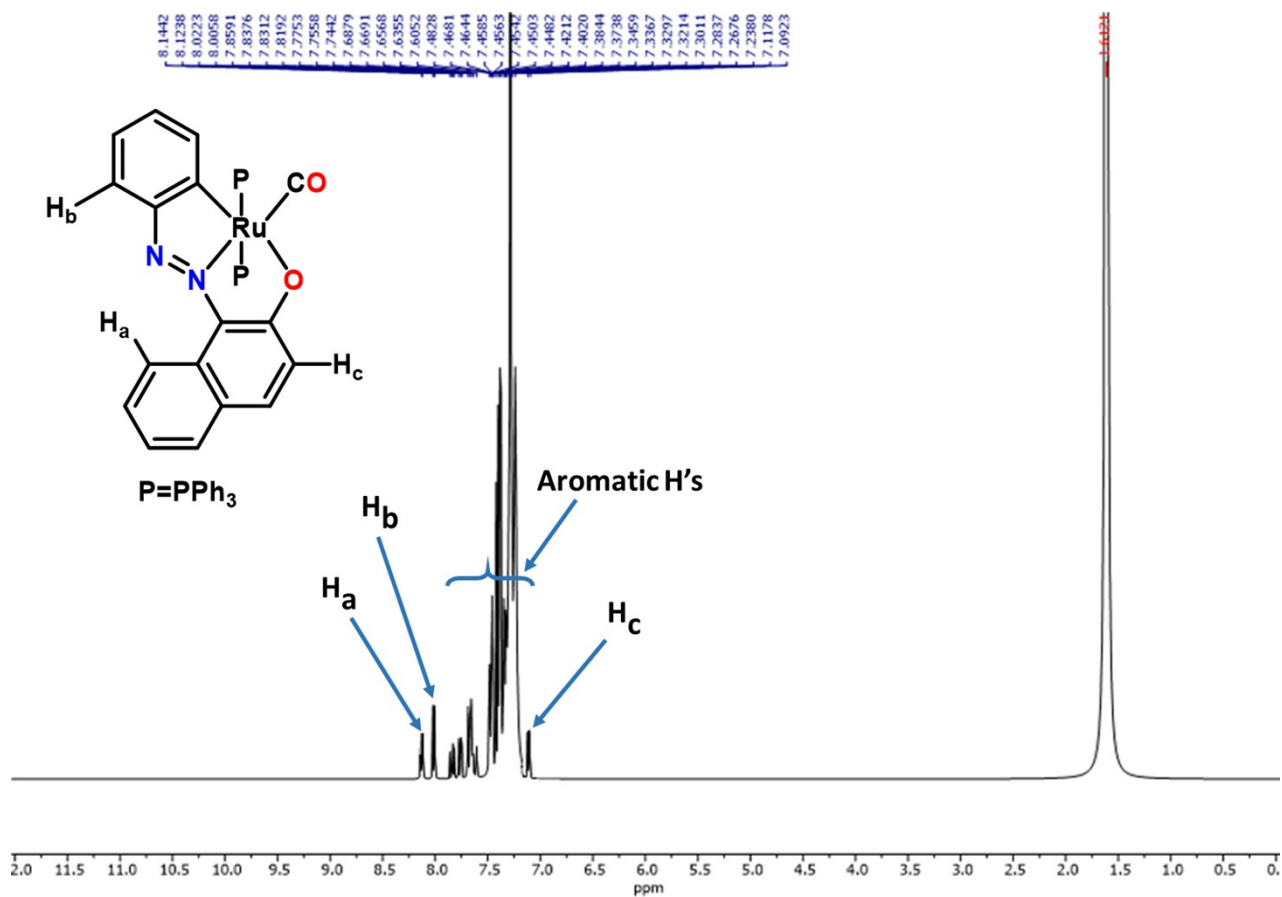

Figure S3:  $^1H$ -NMR spectrum of  $[Ru(L^1)(CO)(PPh_3)_2]$  (1) complex in  $CDCl_3$

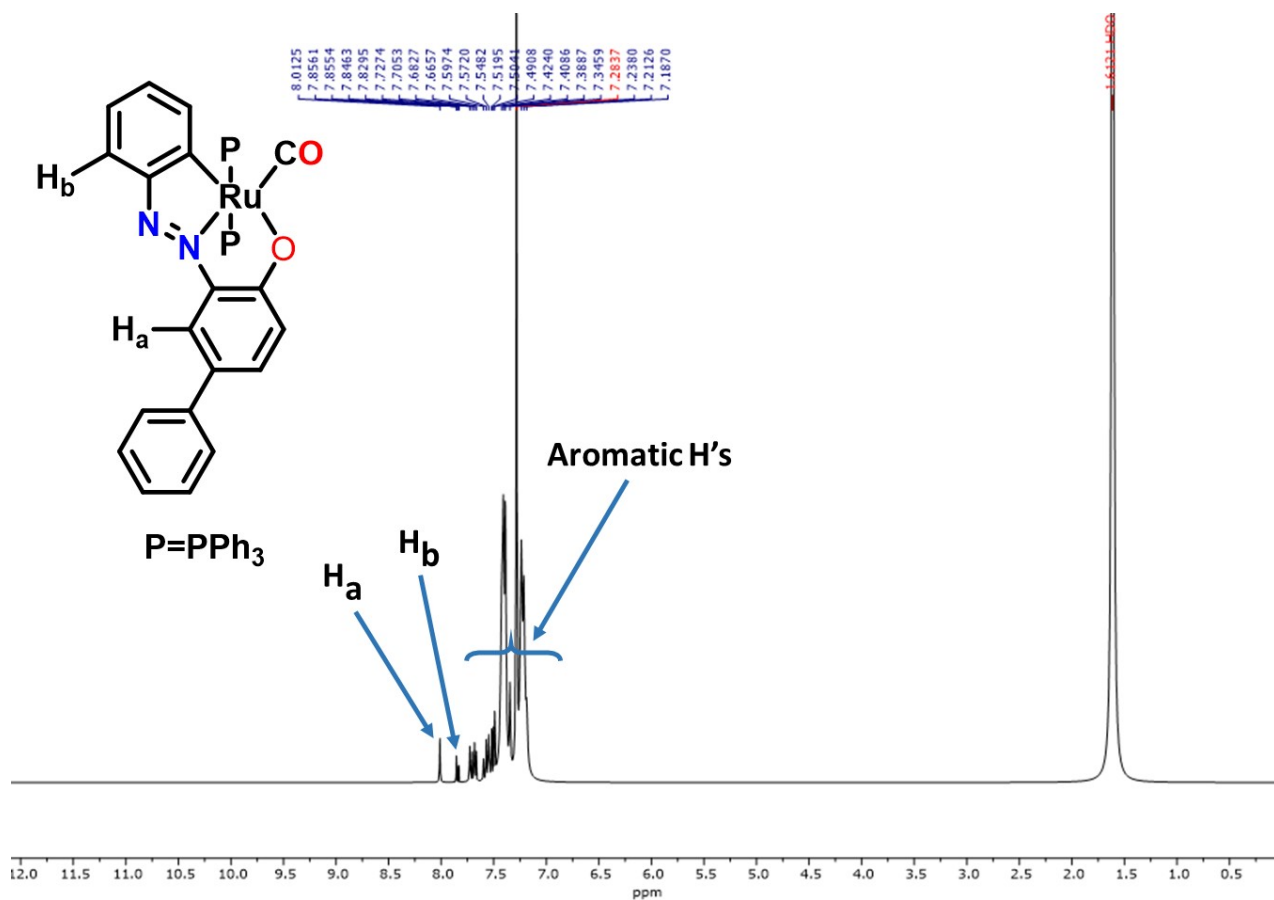

Figure S4:  $^1H$ -NMR spectrum of  $[Ru(L^2)(CO)(PPh_3)_2]$  (2) complex in  $CDCl_3$

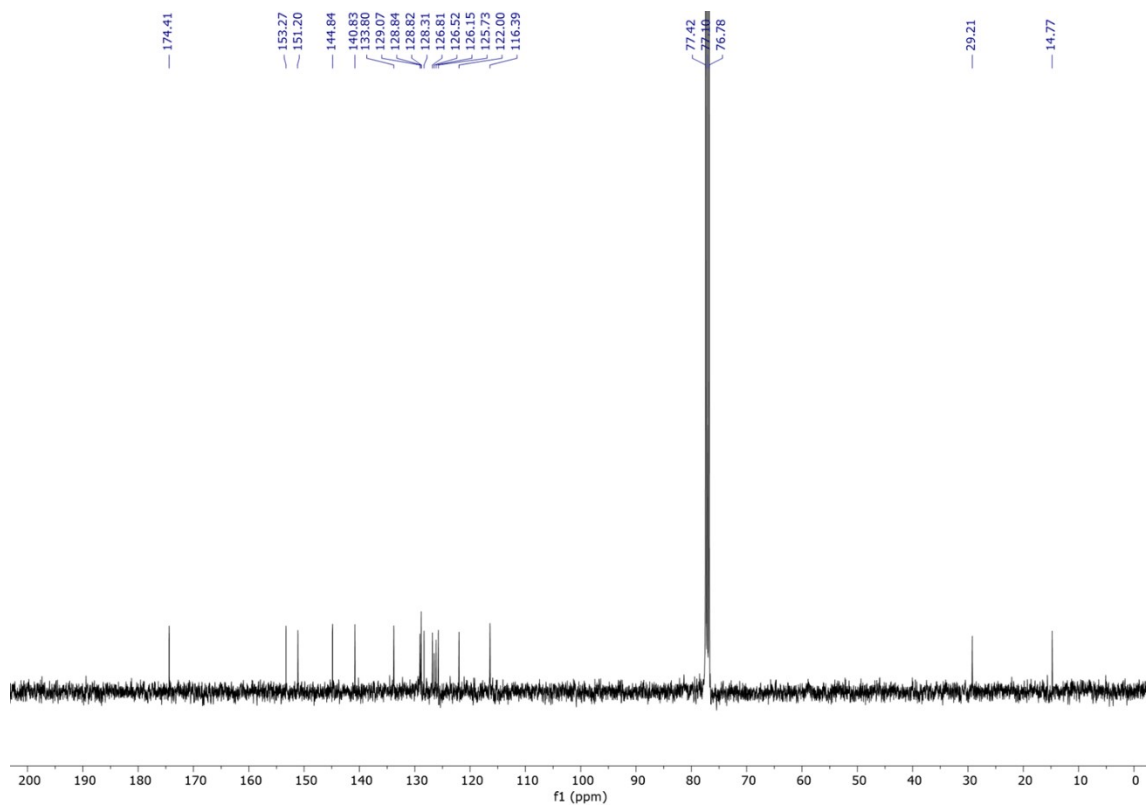

Figure S5:  $^{13}\text{C}$ -NMR spectrum of ligand HL<sup>1</sup>-SEt in  $\text{CDCl}_3$

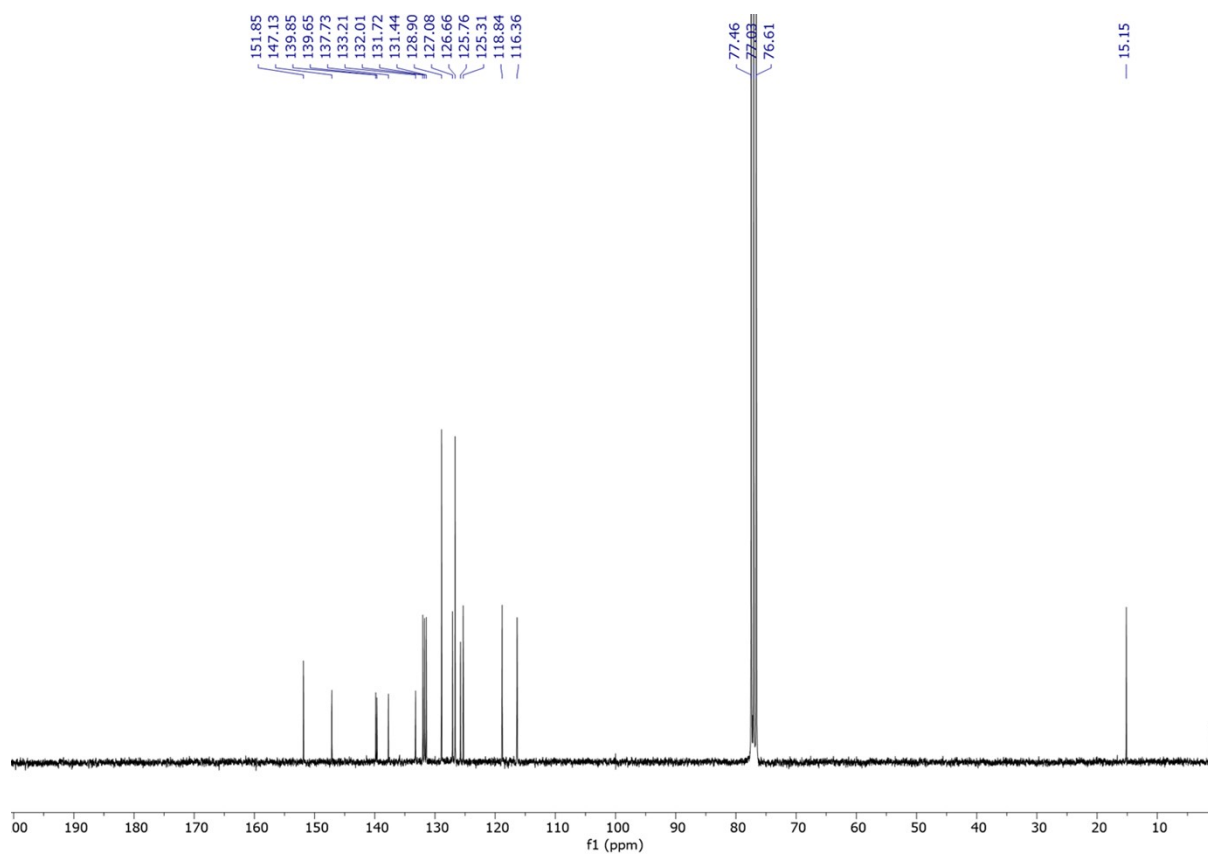

Figure S6:  $^{13}\text{C}$ -NMR spectrum of ligand HL<sup>2</sup>-SMe in  $\text{CDCl}_3$

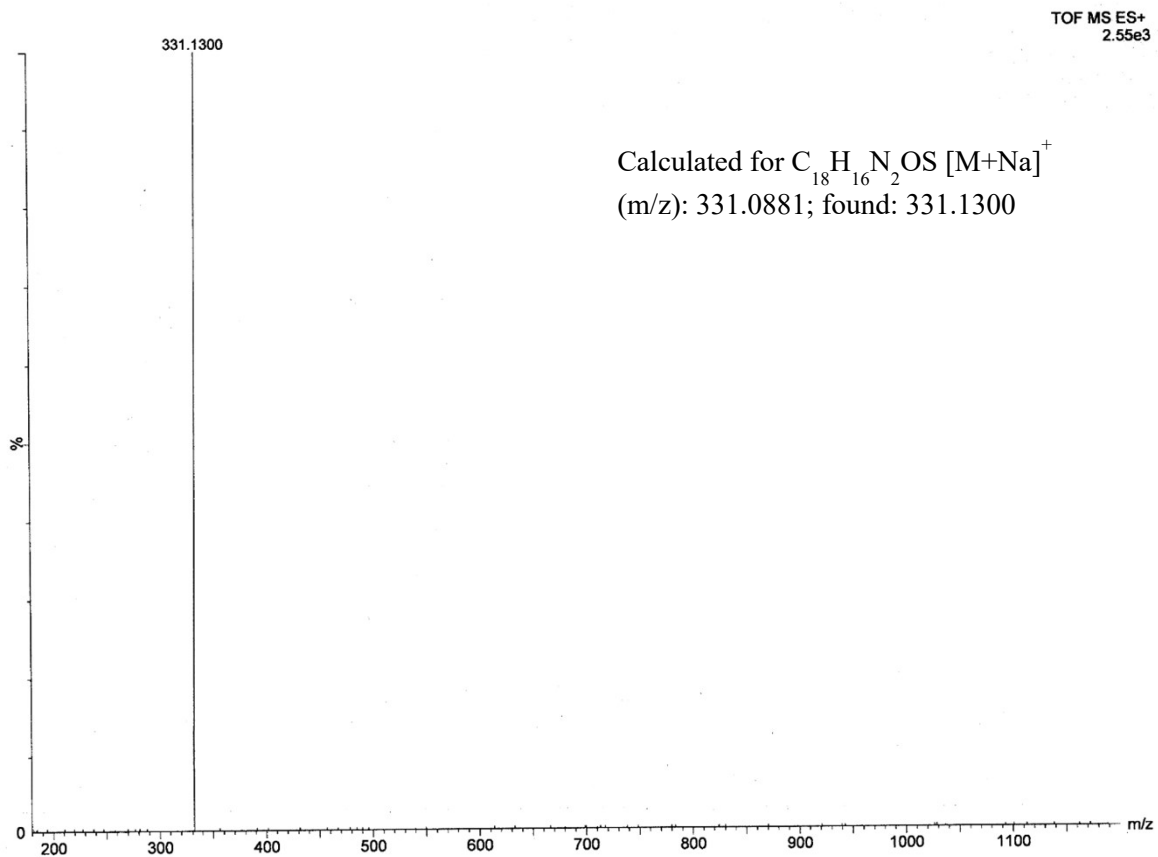

**Figure S7:** HRMS of ligand HL<sup>1</sup>-SEt

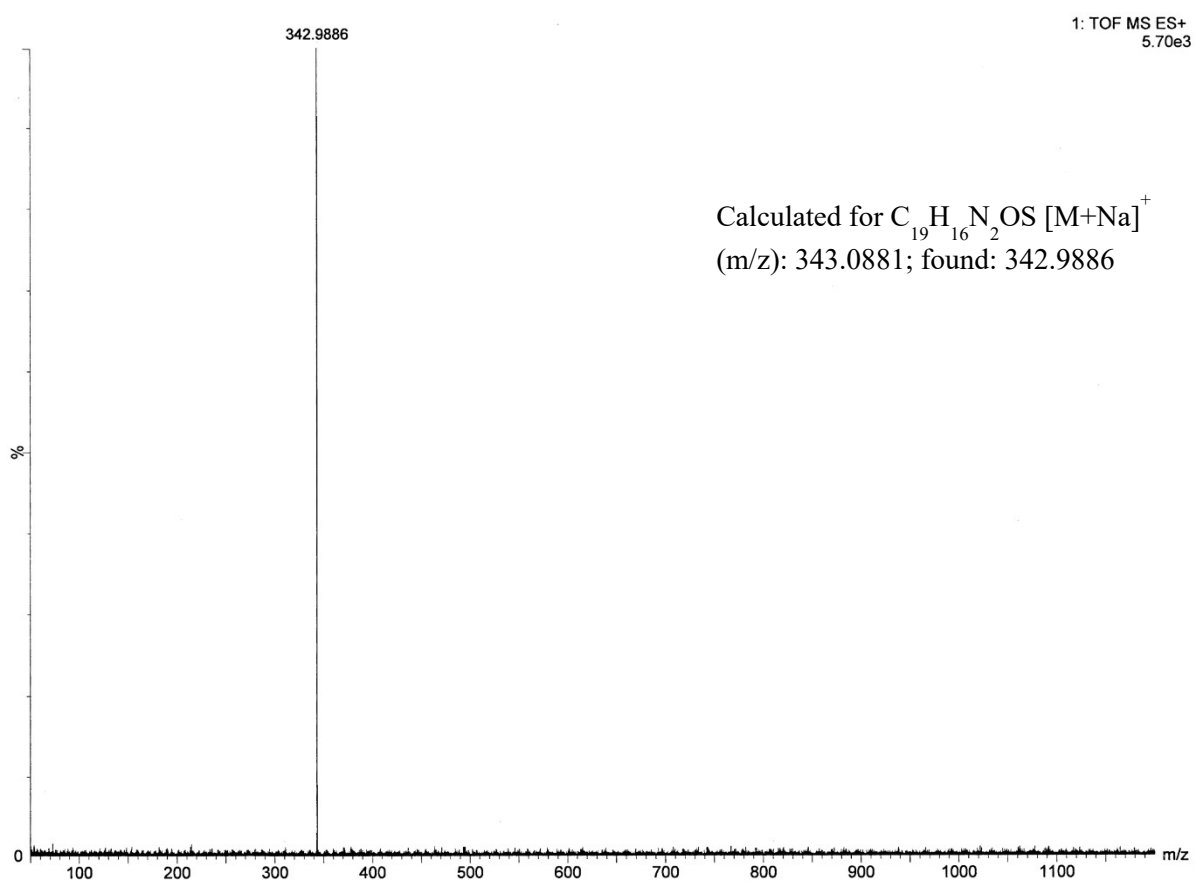

**Figure S8:** HRMS of ligand HL<sup>2</sup>-SMe

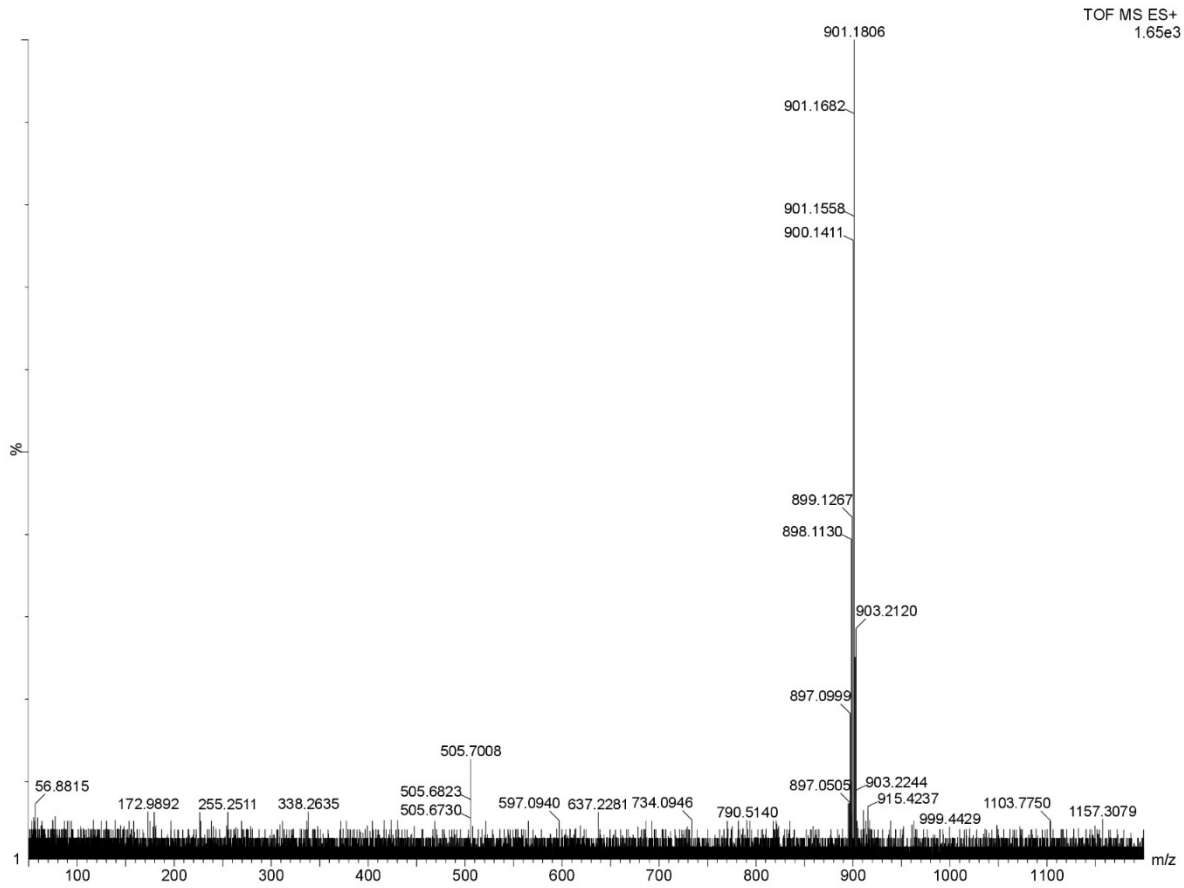

Figure S9: HRMS of  $[\text{Ru}(\text{L}^1)(\text{CO})(\text{PPh}_3)_2]$  (1) complex

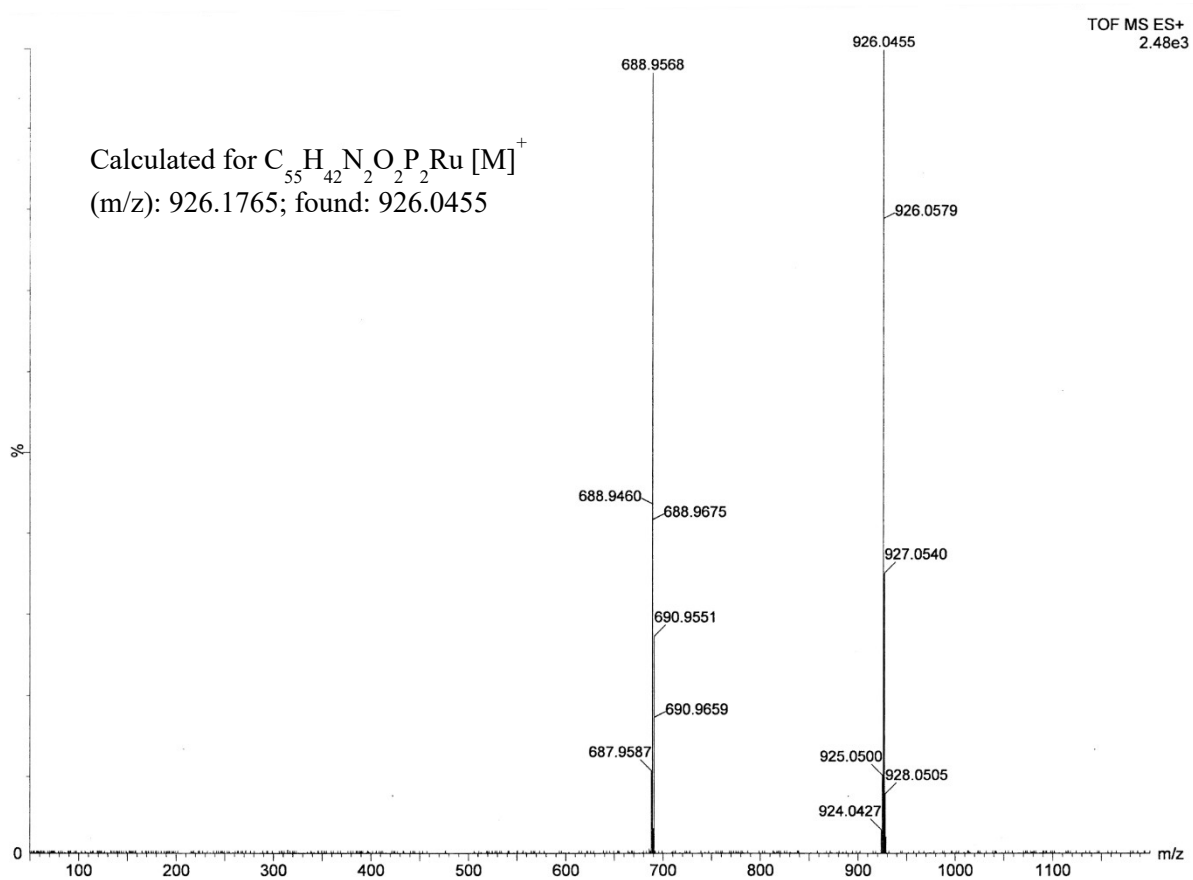

Figure S10: HRMS of  $[\text{Ru}(\text{L}^2)(\text{CO})(\text{PPh}_3)_2]$  (2) complex

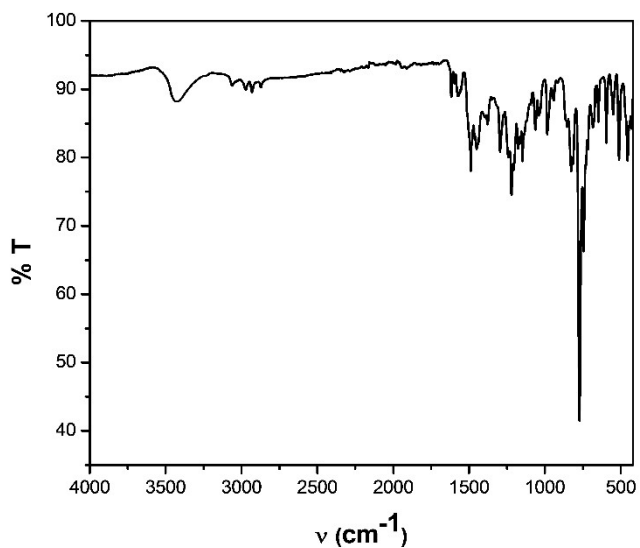

**Figure S11:** IR spectrum of ligand HL<sup>1</sup>-SEt

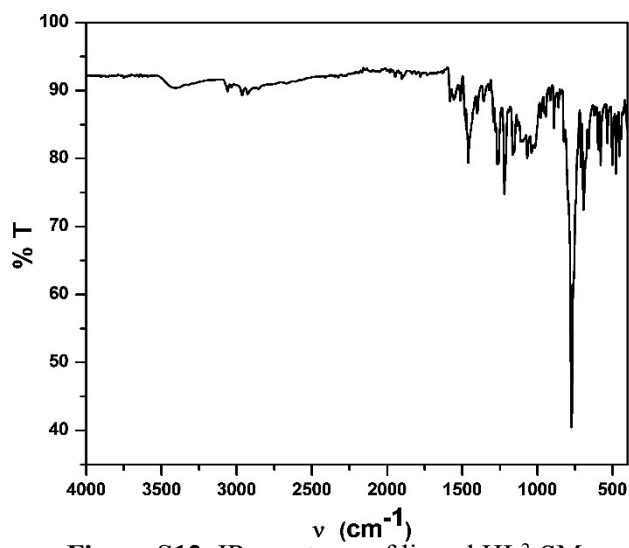

**Figure S12:** IR spectrum of ligand HL<sup>2</sup>-SMe

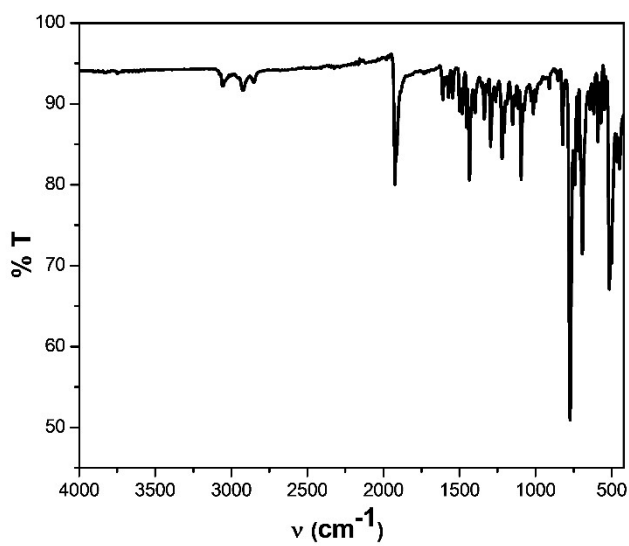

**Figure S13:** IR spectrum of complex 1

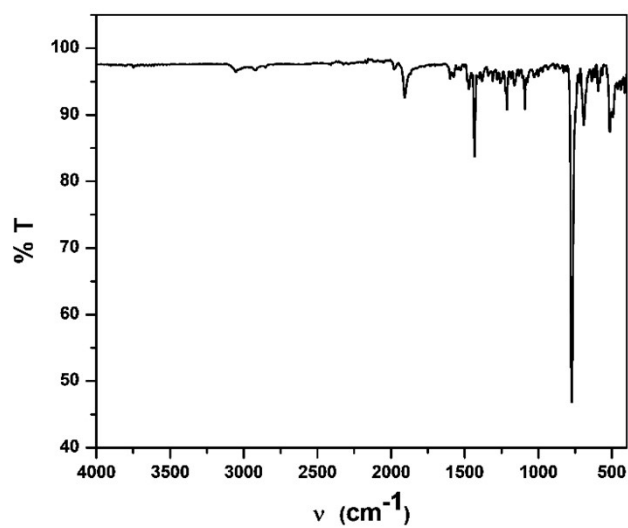

**Figure S14:** IR spectrum of complex 2

**Table S1.** Crystallographic data and refinement parameters of complexes **1** and **2**

| Complex                      | [Ru(L <sup>1</sup> )(CO)(PPh <sub>3</sub> ) <sub>2</sub> ] ( <b>1</b> ) | [Ru(L <sup>2</sup> )(CO)(PPh <sub>3</sub> ) <sub>2</sub> ] ( <b>2</b> ) |
|------------------------------|-------------------------------------------------------------------------|-------------------------------------------------------------------------|
| Formula                      | C53 H40 N2 O2 P2 Ru                                                     | C55 H42 N2 O2 P2 Ru                                                     |
| Formula Weight               | 899.88                                                                  | 925.91                                                                  |
| Crystal System               | <i>monoclinic</i>                                                       | <i>triclinic</i>                                                        |
| Space group                  | <i>C m</i>                                                              | <i>P -1</i>                                                             |
| a, b, c [Å]                  | 18.2738(15),<br>9.8021(7)                                               | 15.3551(11),<br>10.5463(8), 12.0634(9), 17.8689(14)                     |
| α                            | 90                                                                      | 76.220(2)                                                               |
| β                            | 120.739(2)                                                              | 86.297(2)                                                               |
| γ                            | 90                                                                      | 86.034(2)                                                               |
| V [ Å <sup>3</sup> ]         | 2364.0(3)                                                               | 2199.9(3)                                                               |
| Z                            | 2                                                                       | 2                                                                       |
| D(calc) [g/cm <sup>3</sup> ] | 1.264                                                                   | 1.398                                                                   |
| Mu(MoKa) [ /mm]              | 0.440                                                                   | 0.475                                                                   |
| F(000)                       | 924                                                                     | 952                                                                     |
| Temperature (K)              | 293(2)                                                                  | 293(2)                                                                  |
| Radiation [Å]                | 0.71073                                                                 | 0.71073                                                                 |
| θ(Min-Max) [°]               | 2.417- 26.685                                                           | 1.858- 26.420                                                           |
| Dataset (h; k; l)            | -23 to 23, -19 to 19, -12 to 12                                         | -13 to 13, -15 to 15, -22 to 22                                         |
| R, wR <sub>2</sub>           | 0.0343, 0.0643                                                          | 0.0487, 0.1035                                                          |
| Goodness of fit(S)           | 1.066                                                                   | 1.149                                                                   |
| CCDC No.                     | 2262838                                                                 | 2262839                                                                 |



**Table S2.** Selected X-ray and calculated bond distances (Å) and angles (°) of complexes **1** and **2**

| <b>1</b>         |            |         | <b>2</b>        |            |         |
|------------------|------------|---------|-----------------|------------|---------|
| Bonds(Å)         | X-ray      | Calc.   | Bonds(Å)        | X-ray      | Calc.   |
| Ru(1)- C(17)     | 1.853(7)   | 1.861   | Ru(1)- C(2)     | 2.054(4)   | 2.058   |
| Ru(1)- C(1)      | 2.046(6)   | 2.055   | Ru(1)- C(1)     | 1.933(5)   | 1.866   |
| Ru(1)- N(1)      | 2.069(6)   | 2.107   | Ru(1)- N(1)     | 2.037(3)   | 2.085   |
| Ru(1)- O(1)      | 2.192(4)   | 2.216   | Ru(1)- O(2)     | 2.250(2)   | 2.238   |
| Ru(1)- P(1)      | 2.3827(10) | 2.438   | Ru(1)- P(1)     | 2.3781(9)  | 2.439   |
| N(1)-N(2)        | 1.274(7)   | 1.284   | N(1)-N(2)       | 1.274(4)   | 1.277   |
| O(2)-C(17)       | 1.151(8)   | 1.142   | O(1)-C(1)       | 1.004(4)   | 1.114   |
| Angles (°)       |            |         |                 |            |         |
| C(17)-Ru(1)-C(1) | 93.7(3)    | 97.970  | C(1)-Ru(1)-C(2) | 103.39(17) | 98.747  |
| C(17)-Ru(1)-N(1) | 171.6(3)   | 175.729 | C(1)-Ru(1)-N(1) | 178.12(14) | 175.736 |
| C(1)-Ru(1)-N(1)  | 77.9(3)    | 77.759  | C(2)-Ru(1)-N(1) | 77.84(13)  | 76.989  |
| C(17)-Ru(1)-O(1) | 111.1(3)   | 108.598 | C(1)-Ru(1)-O(2) | 100.86(14) | 107.993 |
| C(1)-Ru(1)-O(1)  | 155.20(19) | 153.431 | C(2)-Ru(1)-O(2) | 155.75(13) | 153.257 |
| N(1)-Ru(1)-O(1)  | 77.3(2)    | 75.671  | N(1)-Ru(1)-O(2) | 77.93(10)  | 76.270  |
| C(17)-Ru(1)-P(1) | 88.54(4)   | 88.296  | C(1)-Ru(1)-P(1) | 87.59(10)  | 88.536  |
| C(1)-Ru(1)-P(1)  | 94.59(3)   | 92.849  | C(2)-Ru(1)-P(1) | 90.13(10)  | 92.780  |
| N(1)-Ru(1)-P(1)  | 92.11(4)   | 91.896  | N(1)-Ru(1)-P(1) | 90.99(8)   | 91.567  |
| O(1)-Ru(1)-P(1)  | 86.33(4)   | 88.041  | O(2)-Ru(1)-P(1) | 91.25(6)   | 88.248  |

**Table S3.** Energy and % of composition of some selected molecular orbitals of [Ru(L<sup>1</sup>)(CO)(PPh<sub>3</sub>)<sub>2</sub>]**(1)**

| MO      | Energy | % Composition |                |    |                  |
|---------|--------|---------------|----------------|----|------------------|
|         |        | Ru            | L <sup>1</sup> | CO | PPh <sub>3</sub> |
| LUMO+5  | -0.47  | 02            | 09             | 01 | 88               |
| LUMO+4  | -0.49  | 03            | 00             | 00 | 97               |
| LUMO+3  | -0.59  | 00            | 03             | 02 | 95               |
| LUMO+2  | -0.64  | 03            | 00             | 00 | 96               |
| LUMO+1  | -0.87  | 19            | 02             | 01 | 78               |
| LUMO    | -1.83  | 03            | 92             | 02 | 03               |
| HOMO    | -4.46  | 17            | 82             | 00 | 01               |
| HOMO-1  | -5.45  | 29            | 66             | 00 | 06               |
| HOMO-2  | -5.56  | 52            | 30             | 16 | 02               |
| HOMO-3  | -5.74  | 01            | 89             | 00 | 10               |
| HOMO-4  | -6.06  | 26            | 47             | 03 | 25               |
| HOMO-5  | -6.24  | 04            | 35             | 01 | 59               |
| HOMO-6  | -6.47  | 09            | 75             | 04 | 13               |
| HOMO-7  | -6.58  | 23            | 33             | 01 | 43               |
| HOMO-8  | -6.63  | 30            | 21             | 03 | 45               |
| HOMO-9  | -6.68  | 02            | 02             | 00 | 96               |
| HOMO-10 | -6.72  | 04            | 05             | 01 | 90               |

**Table S4.** Energy and % of composition of some selected molecular orbitals of [Ru(L<sup>2</sup>)(CO)(PPh<sub>3</sub>)<sub>2</sub>]

(2)

| MO      | Energy | % Composition |                |    |                  |
|---------|--------|---------------|----------------|----|------------------|
|         |        | Ru            | L <sup>2</sup> | CO | PPh <sub>3</sub> |
| LUMO+5  | -0.50  | 03            | 03             | 01 | 93               |
| LUMO+4  | -0.52  | 02            | 00             | 00 | 97               |
| LUMO+3  | -0.63  | 00            | 02             | 02 | 97               |
| LUMO+2  | -0.68  | 03            | 00             | 00 | 96               |
| LUMO+1  | -0.92  | 19            | 02             | 01 | 77               |
| LUMO    | -1.92  | 04            | 90             | 03 | 03               |
| HOMO    | -4.51  | 15            | 83             | 00 | 02               |
| HOMO-1  | -5.48  | 28            | 66             | 00 | 06               |
| HOMO-2  | -5.61  | 51            | 31             | 15 | 02               |
| HOMO-3  | -5.84  | 09            | 86             | 01 | 04               |
| HOMO-4  | -6.13  | 15            | 24             | 00 | 61               |
| HOMO-5  | -6.44  | 16            | 40             | 03 | 42               |
| HOMO-6  | -6.48  | 00            | 99             | 00 | 01               |
| HOMO-7  | -6.61  | 30            | 50             | 05 | 16               |
| HOMO-8  | -6.68  | 06            | 26             | 01 | 67               |
| HOMO-9  | -6.70  | 09            | 18             | 00 | 72               |
| HOMO-10 | -6.72  | 01            | 11             | 01 | 87               |

**Table S5:** Vertical electronic transition calculated by TDDFT/CPCM method of complexes **1** and **2**

| Compd.   | $\lambda$ (nm) | E (eV) | Osc. Strength (f) | Key excitations  | Character | $\lambda_{\text{expt.}}$ (nm) ( $\epsilon$ , $\text{M}^{-1}\text{cm}^{-1}$ ) |
|----------|----------------|--------|-------------------|------------------|-----------|------------------------------------------------------------------------------|
| <b>1</b> | 613.06         | 2.0224 | 0.1216            | (94%)HOMO→LUMO   | ILCT/MLCT | 656 (5248)                                                                   |
|          | 405.29         | 3.0592 | 0.1986            | (92%)HOMO-1→LUMO | ILCT/MLCT | 432 (8854)                                                                   |
|          | 374.31         | 3.3123 | 0.1473            | (93%)HOMO-3→LUMO | ILCT      | 364 (10196)                                                                  |
|          | 332.91         | 3.7355 | 0.0633            | (80%)HOMO-5→LUMO | ILCT      |                                                                              |
| <b>2</b> | 637.97         | 1.9434 | 0.1192            | (95%)HOMO→LUMO   | ILCT/MLCT | 682 (4419)                                                                   |
|          | 427.45         | 2.9005 | 0.0524            | (90%)HOMO-1→LUMO | ILCT/MLCT | 434 (3828)                                                                   |
|          | 370.20         | 3.3491 | 0.0543            | (72%)HOMO-3→LUMO | ILCT      |                                                                              |
|          | 329.05         | 3.7680 | 0.1119            | (70%)HOMO-6→LUMO | ILCT      | 319 (22914)                                                                  |

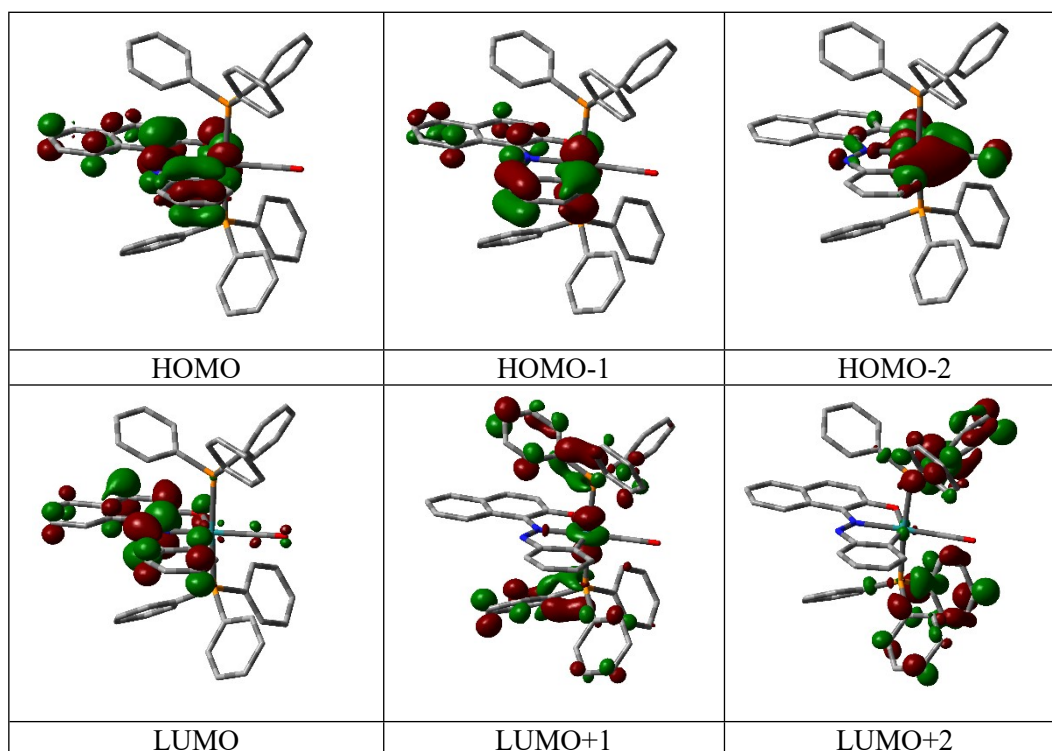**Figure S15.** Contour plots of some selected molecular orbital of **1**

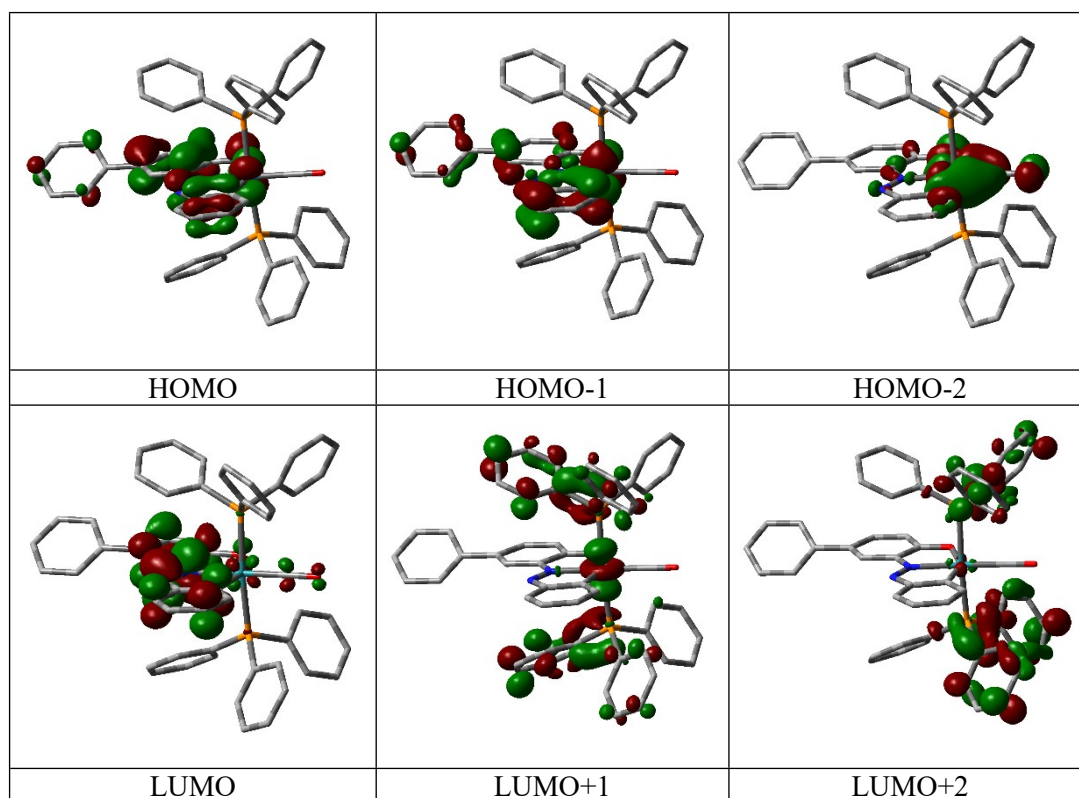

**Figure S16.** Contour plots of some selected molecular orbital of **2**

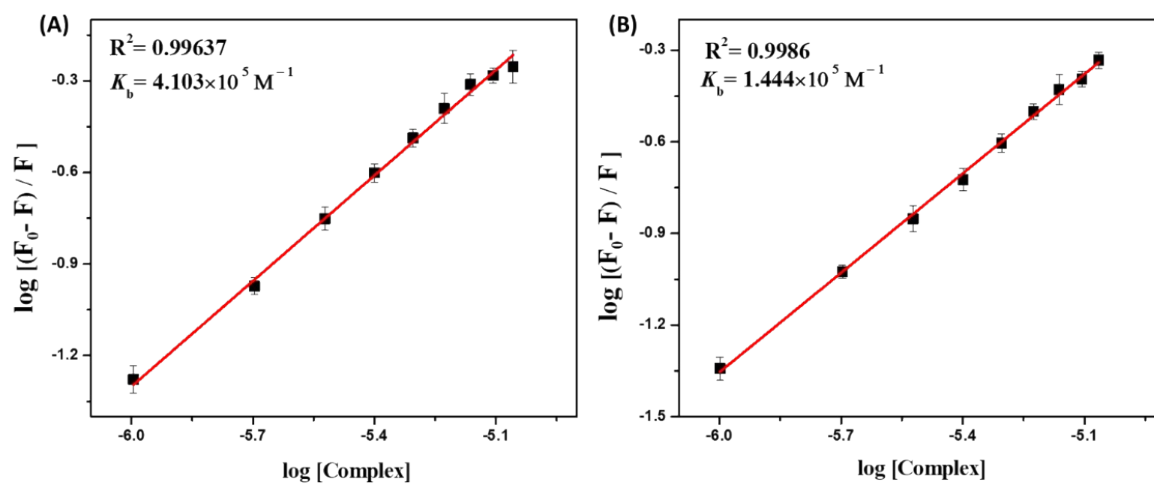

**Figure S17.** Plot of  $\log [(F_0 - F) / F]$  versus  $\log [\text{complex}]$  of complexes **1** (A) and **2** (B)

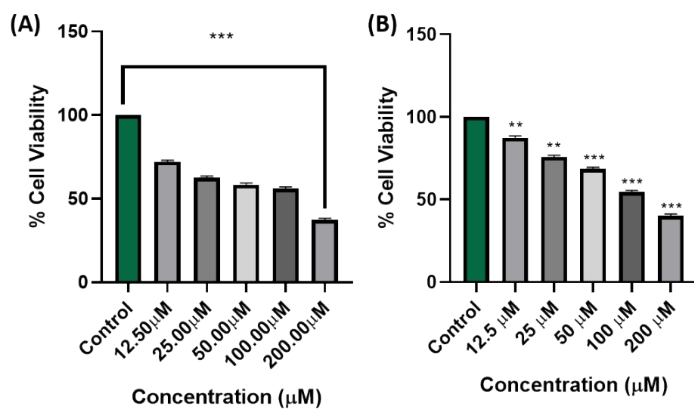

**Figure S18.** Percentage cell viability measured for HL<sup>1</sup>-SEt (A) and HL<sup>2</sup>-SMe (B) against MCF-7

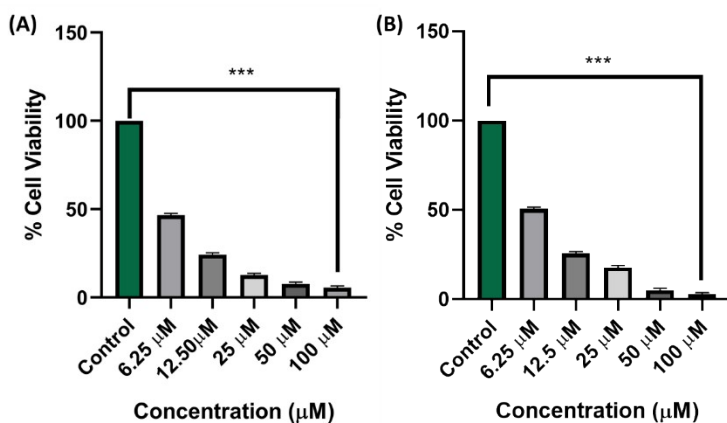

**Figure S19.** Percentage cell viability measured for complex 1 (A) and 2 (B) against MCF-7

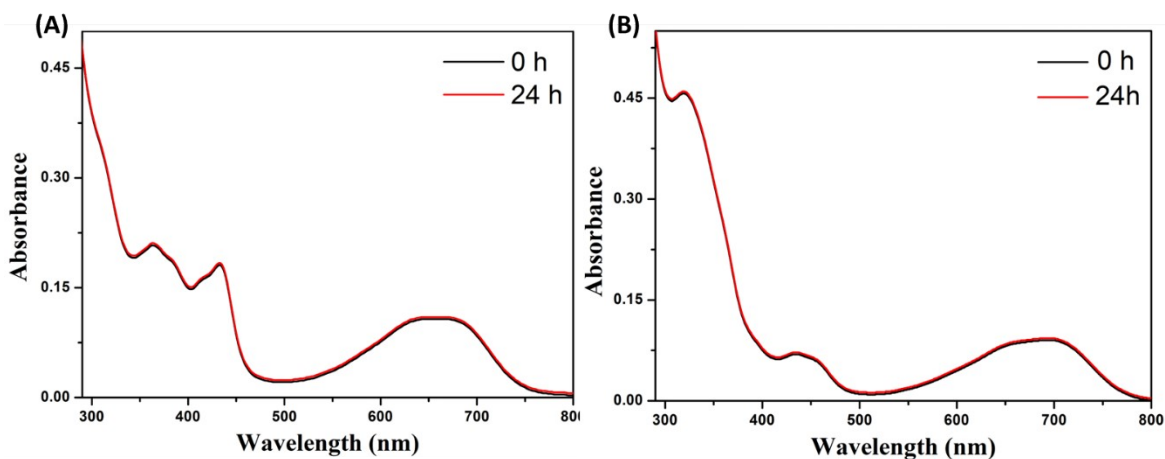

**Figure S20.** UV spectra of the metal complexes 1(A) and 2(B), showing their stability in 1:10 DMSO /buffer medium at 0 and 24 h.

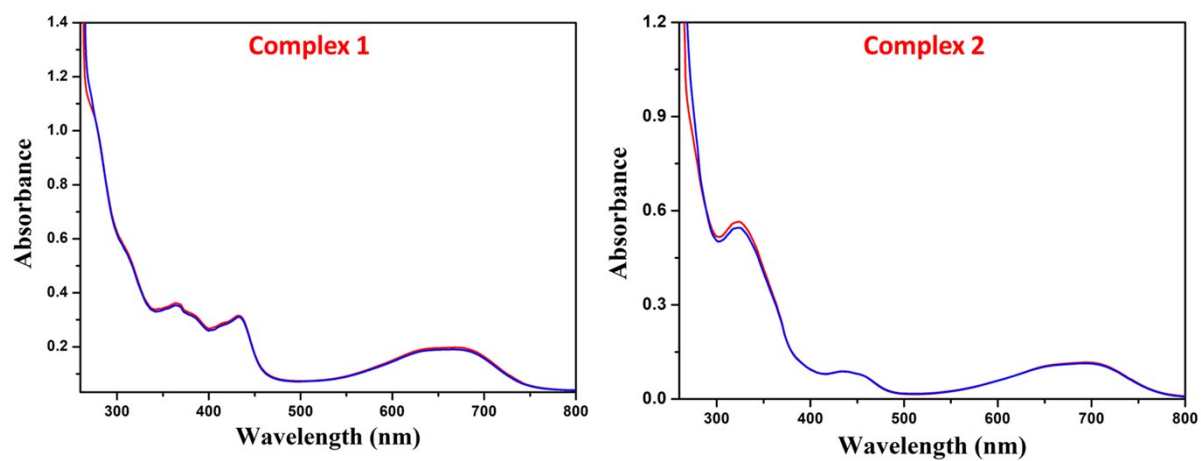

**Figure S21:** Absorption spectra of complexes (—) and after addition of BSA (—).
